# Supplementary material for: Modulation of Paracellular-like Drug Transport across an Artificial Biomimetic Barrier by Osmotic Stress-Induced Liposome Shrinking
Source: MDPI journal article supplement (doi:10.3390/pharmaceutics14040721), 2022-03-28
Supplement: s1 [file s1]

### Calcein

|                        |           |          |          |          |          |
|------------------------|-----------|----------|----------|----------|----------|
| Osmolality             | 50        |          |          |          |          |
| Barrier                | PermeaPad |          |          |          |          |
| Time                   | A         | B        | C        | mean     | SD       |
| 1800                   | 2.352798  | 2.419319 | 2.384228 | 2.385448 | 0.027171 |
| 2700                   | 3.966294  | 3.967779 | 3.770734 | 3.901603 | 0.09254  |
| 3600                   | 5.539146  | 5.589198 | 5.150847 | 5.426397 | 0.195912 |
| 4500                   | 6.917449  | 7.364132 | 6.651946 | 6.977842 | 0.293868 |
| 5400                   | 8.612041  | 9.296521 | 8.337431 | 8.748665 | 0.403289 |
| Flux (µg/cn            | 0.001719  | 0.001906 | 0.001643 | 0.001756 | 0.00011  |
| Papp (10 <sup>-6</sup> | 0.592707  | 0.657117 | 0.566575 | 0.605466 | 0.038049 |
| Mass in do             | 27134.89  | 27134.89 | 27134.89 | 27134.89 | 0        |
| Mass in do             | 0         | 25648.6  | 27462.69 | 17703.76 | 12540.34 |
| Mass Balar             | N/A       | 94.55686 | 101.2388 | 97.89781 | 3.340949 |

The time is represented in seconds

The green cells represent the cumulative amount (µg) of drug permeated at each timepoint for the replicates

If not other stated the membrane has been pretreated for 30minutes

|                        |           |          |          |          |          |
|------------------------|-----------|----------|----------|----------|----------|
| Osmolality             | 150       |          |          |          |          |
| Barrier                | PermeaPad |          |          |          |          |
| Time                   | A         | B        | C        | mean     | SD       |
| 1800                   | 2.722269  | 2.992343 | 2.097506 | 2.604039 | 0.374759 |
| 2700                   | 3.937933  | 4.178911 | 3.132366 | 3.749736 | 0.447495 |
| 3600                   | 6.274996  | 5.740072 | 4.447429 | 5.487499 | 0.767179 |
| 4500                   | 8.090355  | 7.559222 | 5.641531 | 7.097036 | 1.051791 |
| 5400                   | 10.37092  | 9.144638 | 6.948258 | 8.821273 | 1.415882 |
| Flux (µg/cn            | 0.002161  | 0.001743 | 0.001357 | 0.001754 | 0.000328 |
| Papp (10 <sup>-6</sup> | 0.7452    | 0.600954 | 0.467842 | 0.604665 | 0.113262 |
| Mass in do             | 26354.29  | 26354.29 | 26354.29 | 26354.29 | 3.64E-12 |
| Mass in do             | 0         | 30727.65 | 36570.53 | 22432.73 | 16040.68 |
| Mass Balar             | N/A       | 116.6292 | 138.7914 | 127.7103 | 11.08109 |

|                        |           |          |          |          |          |
|------------------------|-----------|----------|----------|----------|----------|
| Osmolality             | 250       |          |          |          |          |
| Barrier                | PermeaPad |          |          |          |          |
| Time                   | A         | B        | C        | mean     | SD       |
| 1800                   | 1.025334  | 0.83875  | 1.316374 | 1.060152 | 0.196538 |
| 2700                   | 1.737059  | 1.37486  | 2.173228 | 1.761716 | 0.326399 |
| 3600                   | 2.435813  | 1.958336 | 3.097578 | 2.497242 | 0.467118 |
| 4500                   | 3.578397  | 2.754101 | 3.841598 | 3.391365 | 0.463248 |
| 5400                   | 4.419303  | 3.455611 | 4.897316 | 4.25741  | 0.599603 |
| Flux (µg/cn            | 0.000959  | 0.000735 | 0.000981 | 0.000892 | 0.000111 |
| Papp (10 <sup>-6</sup> | 0.330624  | 0.25337  | 0.338324 | 0.307439 | 0.038362 |
| Mass in do             | 23200     | 23200    | 23200    | 23200    | 0        |
| Mass in do             | 0         | 25810.18 | 28863.48 | 18224.55 | 12946.85 |
| Mass Balar             | N/A       | 111.2657 | 124.4327 | 117.8492 | 6.583503 |

|            |           |          |          |          |          |
|------------|-----------|----------|----------|----------|----------|
| Osmolality | 300       |          |          |          |          |
| Barrier    | PermeaPad |          |          |          |          |
| Time       | A         | B        | C        | mean     | SD       |
| 1800       | 0.786753  | 1.377624 | 1.092924 | 1.085767 | 0.241275 |
| 2700       | 1.510291  | 2.111147 | 1.907748 | 1.843062 | 0.249526 |
| 3600       | 2.278859  | 2.490094 | 3.060344 | 2.609766 | 0.330071 |
| 4500       | 3.256127  | 3.977803 | 4.009698 | 3.747876 | 0.347963 |

|             |          |          |          |          |          |
|-------------|----------|----------|----------|----------|----------|
| 5400        | 4.294801 | 5.137641 | 4.688903 | 4.707115 | 0.344329 |
| Flux (µg/cn | 0.000974 | 0.001043 | 0.001033 | 0.001016 | 3.06E-05 |
| Papp (10-6  | 0.335706 | 0.359643 | 0.356088 | 0.350479 | 0.010546 |
| Mass in do  | 26354.29 | 26354.29 | 26354.29 | 26354.29 | 3.64E-12 |
| Mass in do  | 0        | 23377.63 | 28425.53 | 17267.72 | 12382.81 |
| Mass Balar  | N/A      | 88.70523 | 107.8592 | 98.28223 | 9.577    |

|             |           |          |          |          |          |
|-------------|-----------|----------|----------|----------|----------|
| Osmolality  | 350       |          |          |          |          |
| Barrier     | PermeaPad |          |          |          |          |
| Time        | A         | B        | C        | mean     | SD       |
| 1800        | 1.018616  | 1.059631 | 0.845601 | 0.974616 | 0.092751 |
| 2700        | 1.980759  | 1.783252 | 1.556532 | 1.773515 | 0.173327 |
| 3600        | 2.930949  | 2.499138 | 2.490306 | 2.640131 | 0.205671 |
| 4500        | 4.936015  | 3.256273 | 3.165155 | 3.785814 | 0.814165 |
| 5400        | 5.874554  | 4.006648 | 4.246987 | 4.709396 | 0.829713 |
| Flux (µg/cn | 0.001407  | 0.000819 | 0.000935 | 0.001054 | 0.000255 |
| Papp (10-6  | 0.485331  | 0.282263 | 0.322276 | 0.36329  | 0.087829 |
| Mass in do  | 26354.29  | 26354.29 | 26354.29 | 26354.29 | 3.64E-12 |
| Mass in do  | 0         | 30422.98 | 29677.51 | 20033.5  | 14169.09 |
| Mass Balar  | N/A       | 115.4537 | 112.6259 | 114.0398 | 1.413877 |

|             |           |          |          |          |          |
|-------------|-----------|----------|----------|----------|----------|
| Osmolality  | 450       |          |          |          |          |
| Barrier     | PermeaPad |          |          |          |          |
| Time        | A         | B        | C        | mean     | SD       |
| 1800        | 1.557624  | 1.616357 | 0.707384 | 1.293788 | 0.415343 |
| 2700        | 2.67906   | 2.555837 | 1.158846 | 2.131248 | 0.68943  |
| 3600        | 4.200732  | 3.601665 | 1.948268 | 3.250222 | 0.952552 |
| 4500        | 5.70179   | 4.67077  | 2.517171 | 4.296577 | 1.326767 |
| 5400        | 7.219363  | 5.606752 | 3.013449 | 5.279854 | 1.732546 |
| Flux (µg/cn | 0.001594  | 0.001122 | 0.000663 | 0.001126 | 0.00038  |
| Papp (10-6  | 0.549663  | 0.386809 | 0.228753 | 0.388409 | 0.131016 |
| Mass in do  | 26354.29  | 26354.29 | 26354.29 | 26354.29 | 3.64E-12 |
| Mass in do  | 0         | 28456.95 | 23846.05 | 17434.33 | 12470.82 |
| Mass Balar  | N/A       | 107.9997 | 90.49406 | 99.24689 | 8.752829 |

|             |           |          |          |          |          |
|-------------|-----------|----------|----------|----------|----------|
| Osmolality  | 900       |          |          |          |          |
| Barrier     | PermeaPad |          |          |          |          |
| Time        | A         | B        | C        | mean     | SD       |
| 1800        | 1.775204  | 1.743988 | 2.503923 | 2.007705 | 0.351111 |
| 2700        | 2.971425  | 2.974116 | 4.38893  | 3.444823 | 0.667585 |
| 3600        | 4.260474  | 4.150725 | 6.045805 | 4.819001 | 0.868637 |
| 4500        | 5.5816    | 6.078119 | 7.130985 | 6.263568 | 0.645983 |
| 5400        | 7.150297  | 7.665502 | 8.919503 | 7.911767 | 0.74297  |
| Flux (µg/cn | 0.001484  | 0.001661 | 0.00173  | 0.001625 | 0.000103 |
| Papp (10-6  | 0.511891  | 0.572683 | 0.596675 | 0.560416 | 0.035683 |
| Mass in do  | 23200     | 23200    | 23200    | 23200    | 0        |
| Mass in do  | 0         | 27521.53 | 27501.44 | 18340.99 | 12969.04 |
| Mass Balar  | N/A       | 118.6603 | 118.5791 | 118.6197 | 0.040601 |

|            |    |
|------------|----|
| Osmolality | 50 |
|------------|----|

|                        |               |          |          |          |          |
|------------------------|---------------|----------|----------|----------|----------|
| Barrier                | Support sheet |          |          |          |          |
| Time                   | A             | B        | C        | mean     | SD       |
| 1800                   | 6.53103       | 5.438897 | 5.058651 | 5.676193 | 0.624076 |
| 2700                   | 14.86624      | 14.29101 | 14.65038 | 14.60254 | 0.23726  |
| 3600                   | 27.16886      | 21.26934 | 16.06483 | 21.50101 | 4.536158 |
| 4500                   | 25.20685      | 27.66729 | 22.69408 | 25.18941 | 2.030342 |
| 5400                   | 33.02143      | 36.77013 | 29.5732  | 33.12159 | 2.938989 |
| Flux (µg/cn            | 0.007036      | 0.008449 | 0.006341 | 0.007275 | 0.000877 |
| Papp (10 <sup>-6</sup> | 2.426108      | 2.913362 | 2.186697 | 2.508722 | 0.302357 |
| Mass in do             | 23200         | 23200    | 23200    | 23200    | 0        |
| Mass in do             | 17651.84      | 17651.84 | 18439.77 | 17914.48 | 371.4372 |
| Mass Balar             | 76.22783      | 76.24399 | 79.60925 | 77.36036 | 1.590221 |

|                        |               |          |          |          |          |
|------------------------|---------------|----------|----------|----------|----------|
| Osmolality             | 300           |          |          |          |          |
| Barrier                | Support sheet |          |          |          |          |
| Time                   | A             | B        | C        | mean     | SD       |
| 1800                   | 3.277501      | 5.641885 | 6.085028 | 5.001471 | 1.232382 |
| 2700                   | 9.869295      | 15.35484 | 10.74758 | 11.99057 | 2.405766 |
| 3600                   | 10.82345      | 16.8339  | 11.76148 | 13.13961 | 2.640178 |
| 4500                   | 21.70973      | 28.57673 | 24.48867 | 24.92504 | 2.820373 |
| 5400                   | 25.02083      | 43.88759 | 37.70102 | 35.53648 | 7.852919 |
| Flux (µg/cn            | 0.006147      | 0.009968 | 0.008553 | 0.008223 | 0.001577 |
| Papp (10 <sup>-6</sup> | 2.119812      | 3.437291 | 2.94916  | 2.835421 | 0.543838 |
| Mass in do             | 23200         | 23200    | 23200    | 23200    | 0        |
| Mass in do             | 18902.93      | 18832.03 | 26419.78 | 21384.91 | 3560.308 |
| Mass Balar             | 81.58599      | 81.36169 | 114.0409 | 92.32952 | 15.35252 |

|                        |                                |          |          |          |          |
|------------------------|--------------------------------|----------|----------|----------|----------|
| Osmolality             | 50                             |          |          |          |          |
| Barrier                | PermeaPad (2 min pretreatment) |          |          |          |          |
| Time                   | A                              | B        | C        | mean     | SD       |
| 1800                   | 3.346277                       | 2.819065 | 2.615702 | 2.927014 | 0.307869 |
| 2700                   | 4.882181                       | 4.134232 | 3.325826 | 4.11408  | 0.635539 |
| 3600                   | 6.781032                       | 5.929752 | 5.06821  | 5.926331 | 0.699261 |
| 4500                   | 8.123736                       | 7.297134 | 6.25638  | 7.22575  | 0.764014 |
| 5400                   | 9.469156                       | 8.683058 | 7.587025 | 8.579746 | 0.771842 |
| Flux (µg/cn            | 0.001721                       | 0.001655 | 0.00143  | 0.001602 | 0.000124 |
| Papp (10 <sup>-6</sup> | 0.593384                       | 0.570532 | 0.493226 | 0.552381 | 0.042856 |
| Mass in do             | 38619.41                       | 38619.41 | 38619.41 | 38619.41 | 0        |
| Mass in do             | 36571.7                        | 38989.18 | 38801.07 | 38120.65 | 1097.963 |
| Mass Balar             | N/A                            | 100.98   | 100.49   | 100.735  | 0.244962 |

|             |                                |          |          |          |          |
|-------------|--------------------------------|----------|----------|----------|----------|
| Osmolality  | 300                            |          |          |          |          |
| Barrier     | PermeaPad (2 min pretreatment) |          |          |          |          |
| Time        | A                              | B        | C        | mean     | SD       |
| 1800        | 1.022652                       | 0.919154 | 1.44209  | 1.127965 | 0.226103 |
| 2700        | 1.754337                       | 1.51386  | 2.249111 | 1.839103 | 0.306091 |
| 3600        | 3.313618                       | 2.476483 | 3.020092 | 2.936731 | 0.346805 |
| 4500        | 4.030724                       | 3.236028 | 3.630994 | 3.632582 | 0.324435 |
| 5400        | 5.713853                       | 3.50439  | 4.854991 | 4.691078 | 0.909426 |
| Flux (µg/cn | 0.001295                       | 0.000766 | 0.000912 | 0.000991 | 0.000223 |

|                          |          |          |          |          |          |
|--------------------------|----------|----------|----------|----------|----------|
| Papp (10 <sup>-6</sup> ) | 0.446697 | 0.264086 | 0.314471 | 0.341751 | 0.077006 |
| Mass in do               | 38619.41 | 38619.41 | 38619.41 | 38619.41 | 0        |
| Mass in do               | 38705.4  | 40006.77 | 36971.93 | 38561.37 | 1243.148 |
| Mass Balar               | N/A      | 103.5924 | 95.73405 | 99.66322 | 3.929165 |

### Acyclovir

|                          |           |          |          |          |          |
|--------------------------|-----------|----------|----------|----------|----------|
| Osmolality               | 50        |          |          |          |          |
| Barrier                  | PermeaPad |          |          |          |          |
| Time                     | A         | B        | C        | mean     | SD       |
| 1800                     | 8.642868  | 11.47176 | 6.787936 | 8.967521 | 1.925893 |
| 2700                     | 12.50998  | 14.88181 | 9.139719 | 12.17717 | 2.355982 |
| 3600                     | 15.74446  | 20.1892  | 12.03058 | 15.98808 | 3.335196 |
| 4500                     | 20.03138  | 25.1589  | 16.98479 | 20.72502 | 3.372919 |
| 5400                     | 22.68571  | 28.186   | 18.1283  | 23       | 4.11205  |
| Flux (µg/cn)             | 0.003956  | 0.004856 | 0.003392 | 0.004068 | 0.000603 |
| Papp (10 <sup>-6</sup> ) | 3.956342  | 4.856175 | 3.391755 | 4.068091 | 0.603046 |
| Mass in do               | 4.54E+09  | 4.54E+09 | 4.54E+09 | 4.54E+09 | 0        |
| Mass in do               |           | 4.56E+09 | 5.42E+09 | 4.99E+09 | 4.28E+08 |
| Mass Balar               | N/A       | 100.4126 | 119.2611 | 109.8368 | 9.42426  |

|                          |           |          |          |          |          |
|--------------------------|-----------|----------|----------|----------|----------|
| Osmolality               | 150       |          |          |          |          |
| Barrier                  | PermeaPad |          |          |          |          |
| Time                     | A         | B        | C        | mean     | SD       |
| 1800                     | 7.185185  | 8.025222 | 6.862291 | 7.357566 | 0.490162 |
| 2700                     | 11.69368  | 10.88174 | 11.45216 | 11.34253 | 0.340417 |
| 3600                     | 13.46173  | 14.98806 | 14.79659 | 14.41546 | 0.678905 |
| 4500                     | 17.36674  | 18.49908 | 19.26005 | 18.37529 | 0.777882 |
| 5400                     | 20.05896  | 21.60277 | 22.03194 | 21.23122 | 0.84723  |
| Flux (µg/cn)             | 0.003491  | 0.003864 | 0.004239 | 0.003864 | 0.000305 |
| Papp (10 <sup>-6</sup> ) | 3.49118   | 3.863604 | 4.238577 | 3.864453 | 0.305124 |
| Mass in do               | 8000      | 8000     | 8000     | 8000     | 0        |
| Mass in do               | 0         | 3.84E+09 | 4.29E+09 | 2.71E+09 | 1.93E+09 |
| Mass Balar               | N/A       | 48041659 | 53647048 | 50844353 | 2802694  |

|                          |           |          |          |          |          |
|--------------------------|-----------|----------|----------|----------|----------|
| Osmolality               | 300       |          |          |          |          |
| Barrier                  | PermeaPad |          |          |          |          |
| Time                     | A         | B        | C        | mean     | SD       |
| 1800                     | 3.336903  | 4.926821 | 1.992033 | 3.418586 | 1.199513 |
| 2700                     | 5.594734  | 7.752007 | 5.797458 | 6.3814   | 0.972693 |
| 3600                     | 7.607675  | 10.21861 | 8.030273 | 8.618854 | 1.144282 |
| 4500                     | 10.2066   | 12.40671 | 8.57151  | 10.39494 | 1.571369 |
| 5400                     | 13.23118  | 15.21101 | 9.912064 | 12.78475 | 2.186197 |
| Flux (µg/cn)             | 0.002711  | 0.002803 | 0.002068 | 0.002527 | 0.000327 |
| Papp (10 <sup>-6</sup> ) | 2.711157  | 2.802566 | 2.068235 | 2.527319 | 0.32676  |
| Mass in do               | 4.54E+09  | 4.54E+09 | 4.54E+09 | 4.54E+09 | 0        |
| Mass in do               | 0         | 3.49E+09 | 4.23E+09 | 2.57E+09 | 1.84E+09 |
| Mass Balar               | N/A       | 76.75323 | 93.04274 | 84.89798 | 8.144755 |

|            |           |
|------------|-----------|
| Osmolality | 450       |
| Barrier    | PermeaPad |

| Time        | A        | B        | C        | mean     | SD       |
|-------------|----------|----------|----------|----------|----------|
| 1800        | 5.538156 | 4.593473 | 7.89028  | 6.007303 | 1.386196 |
| 2700        | 8.744851 | 6.832923 | 11.86313 | 9.14697  | 2.073167 |
| 3600        | 11.91241 | 8.989881 | 15.94212 | 12.28147 | 2.850211 |
| 4500        | 15.44527 | 11.75468 | 20.33948 | 15.84648 | 3.516195 |
| 5400        | 18.79114 | 14.1526  | 26.16108 | 19.70161 | 4.944533 |
| Flux (µg/cn | 0.00369  | 0.002671 | 0.005002 | 0.003788 | 0.000954 |
| Papp (10-6  | 3.663223 | 2.652018 | 4.966238 | 3.760493 | 0.947277 |
| Mass in do  | 8057.6   | 8057.6   | 8057.6   | 8057.6   | 9.09E-13 |
| Mass in do  | -203.217 | -203.217 | -203.217 | -203.217 | 0        |
| Mass Balar  | -2.28884 | -2.34641 | -2.19737 | -2.27754 | 0.061365 |

Osmolality 900

Barrier PermeaPad

| Time        | A        | B        | C        | mean     | SD       |
|-------------|----------|----------|----------|----------|----------|
| 1800        | 9.604938 | 10.14885 | 7.271244 | 9.008343 | 1.248223 |
| 2700        | 11.61496 | 14.64508 | 11.30717 | 12.5224  | 1.506209 |
| 3600        | 15.68324 | 19.21094 | 16.90083 | 17.265   | 1.46302  |
| 4500        | 19.96433 | 23.33119 | 19.67644 | 20.99065 | 1.659177 |
| 5400        | 23.45828 | 29.05286 | 24.92064 | 25.81059 | 2.369086 |
| Flux (µg/cn | 0.004006 | 0.005166 | 0.004852 | 0.004675 | 0.00049  |
| Papp (10-6  | 4.006227 | 5.166015 | 4.852006 | 4.67475  | 0.48979  |
| Mass in do  | 4.54E+09 | 4.54E+09 | 4.54E+09 | 4.54E+09 | 0        |
| Mass in do  | 0        | 4.52E+09 | 4.41E+09 | 2.98E+09 | 2.11E+09 |
| Mass Balar  | N/A      | 99.43186 | 97.07279 | 98.25233 | 1.179536 |

Osmolality 50

Barrier Support sheet

| Time        | A        | B        | C        | mean     | SD       |
|-------------|----------|----------|----------|----------|----------|
| 1800        | 63.70013 | 62.82106 | 59.6564  | 62.0592  | 1.736525 |
| 2700        | 101.4204 | 90.43197 | 90.46714 | 94.1065  | 5.171721 |
| 3600        | 128.5069 | 124.8675 | 123.883  | 125.7525 | 1.988718 |
| 4500        | 158.7581 | 143.972  | 151.7079 | 151.4793 | 6.038527 |
| 5400        | 193.0178 | 173.3793 | 179.1109 | 181.836  | 8.245701 |
| Flux (µg/cn | 0.035108 | 0.030517 | 0.03335  | 0.032992 | 0.001891 |
| Papp (10-6  | 34.7605  | 30.21524 | 33.01977 | 32.66517 | 1.87246  |
| Mass in do  | 8080     | 8080     | 8080     | 8080     | 0        |
| Mass in do  | 6685.375 | 6685.375 | 5939.921 | 6436.89  | 351.4104 |
| Mass Balar  | 85.12863 | 84.88557 | 75.73059 | 81.91493 | 4.374113 |

Osmolality 300

Barrier Support sheet

| Time        | A        | B        | C        | mean     | SD       |
|-------------|----------|----------|----------|----------|----------|
| 1800        | 66.33735 | 58.77732 | 68.27132 | 64.462   | 4.096477 |
| 2700        | 90.7836  | 80.53361 | 96.25144 | 89.18955 | 6.515023 |
| 3600        | 125.2192 | 122.1072 | 130.1595 | 125.8286 | 3.315472 |
| 4500        | 158.3888 | 137.2032 | 158.1251 | 151.239  | 9.925442 |
| 5400        | 184.9831 | 170.6542 | 197.2373 | 184.2915 | 10.86355 |
| Flux (µg/cn | 0.033877 | 0.031158 | 0.035534 | 0.033523 | 0.001804 |
| Papp (10-6  | 33.54199 | 30.84964 | 35.18215 | 33.19126 | 1.78604  |

|            |          |          |          |          |          |
|------------|----------|----------|----------|----------|----------|
| Mass in do | 8080     | 8080     | 8080     | 8080     | 0        |
| Mass in do | 3717.624 | 6263.42  | 5616.422 | 5199.155 | 1080.387 |
| Mass Balar | 48.29959 | 79.62963 | 71.95123 | 66.62682 | 13.33304 |

### Hydrocortisone

|             |           |          |          |          |          |
|-------------|-----------|----------|----------|----------|----------|
| Osmolality  | 50        |          |          |          |          |
| Barrier     | PermeaPad |          |          |          |          |
| Time        | A         | B        | C        | mean     | SD       |
| 1800        | 10.10755  | 9.764531 | 5.98928  | 8.620452 | 1.865782 |
| 2700        | 15.44229  | 14.40836 | 9.598403 | 13.14969 | 2.546364 |
| 3600        | 20.0793   | 18.27907 | 12.17616 | 16.84485 | 3.382074 |
| 4500        | 27.8856   | 26.86287 | 19.01755 | 24.58867 | 3.961443 |
| 5400        | 33.83946  | 30.79305 | 24.65979 | 29.7641  | 3.817559 |
| Flux (µg/cn | 0.006656  | 0.006057 | 0.005196 | 0.00597  | 0.0006   |
| Papp (10-6  | 26.84482  | 23.75045 | 20.44708 | 23.68078 | 2.61233  |
| Mass in do  | 1983.652  | 2040.159 | 2032.788 | 2018.866 | 25.08142 |
| Mass in do  | 1951.714  | 1858.607 | 2144.563 | 1984.961 | 119.085  |
| Mass Balar  | 100.0958  | 92.61043 | 106.7117 | 99.80599 | 5.760469 |

|             |           |          |          |          |          |
|-------------|-----------|----------|----------|----------|----------|
| Osmolality  | 150       |          |          |          |          |
| Barrier     | PermeaPad |          |          |          |          |
| Time        | A         | B        | C        | mean     | SD       |
| 1800        | 10.20582  | 6.69186  | 8.259263 | 8.385647 | 1.437348 |
| 2700        | 14.27285  | 10.0868  | 11.65126 | 12.00364 | 1.727015 |
| 3600        | 18.8902   | 13.45696 | 16.53355 | 16.29357 | 2.224591 |
| 4500        | 22.85404  | 18.16027 | 20.16734 | 20.39389 | 1.922909 |
| 5400        | 30.58664  | 21.97646 | 26.92977 | 26.49762 | 3.528345 |
| Flux (µg/cn | 0.005483  | 0.004294 | 0.005095 | 0.004957 | 0.000495 |
| Papp (10-6  | 22.11088  | 16.83646 | 20.05219 | 19.66651 | 2.170476 |
| Mass in do  | 1983.652  | 2040.159 | 2032.788 | 2018.866 | 25.08142 |
| Mass in do  | 1983.652  | 1970.115 | 2536.081 | 2163.283 | 263.6662 |
| Mass Balar  | 101.5419  | 97.64394 | 126.0835 | 108.4231 | 12.58876 |

|             |           |          |          |          |          |
|-------------|-----------|----------|----------|----------|----------|
| Osmolality  | 300       |          |          |          |          |
| Barrier     | PermeaPad |          |          |          |          |
| Time        | A         | B        | C        | mean     | SD       |
| 1800        | 7.749007  | 8.426432 | 4.311466 | 6.828968 | 1.801497 |
| 2700        | 12.70049  | 13.48161 | 7.604766 | 11.26229 | 2.605844 |
| 3600        | 17.77481  | 19.0076  | 13.10883 | 16.63041 | 2.540484 |
| 4500        | 23.53212  | 25.00935 | 15.83464 | 21.4587  | 4.022284 |
| 5400        | 27.29942  | 30.05461 | 21.32883 | 26.22762 | 3.642013 |
| Flux (µg/cn | 0.005548  | 0.006087 | 0.004696 | 0.005444 | 0.000573 |
| Papp (10-6  | 22.3751   | 23.86921 | 18.48128 | 21.5752  | 2.271172 |
| Mass in do  | 1983.652  | 2040.159 | 2032.788 | 2018.866 | 25.08142 |
| Mass in do  | 1995.936  | 1947.813 | 2060.313 | 2001.354 | 46.08719 |
| Mass Balar  | 101.9955  | 95.47392 | 101.3543 | 99.60788 | 2.934856 |

|            |           |   |   |      |    |
|------------|-----------|---|---|------|----|
| Osmolality | 450       |   |   |      |    |
| Barrier    | PermeaPad |   |   |      |    |
| Time       | A         | B | C | mean | SD |

|                        |          |          |          |          |          |
|------------------------|----------|----------|----------|----------|----------|
| 1800                   | 8.387778 | 5.601558 | 5.890585 | 6.62664  | 1.25089  |
| 2700                   | 12.91177 | 9.283943 | 9.933966 | 10.70989 | 1.579417 |
| 3600                   | 18.14824 | 13.77414 | 15.35908 | 15.76049 | 1.808137 |
| 4500                   | 22.60836 | 17.28803 | 18.56848 | 19.48829 | 2.267308 |
| 5400                   | 29.71201 | 22.07063 | 25.61219 | 25.79828 | 3.122356 |
| Flux (µg/cn            | 0.005816 | 0.004549 | 0.005342 | 0.005236 | 0.000523 |
| Papp (10 <sup>-6</sup> | 23.4562  | 17.83836 | 21.02322 | 20.77259 | 2.30031  |
| Mass in do             | 1983.652 | 2040.159 | 2032.788 | 2018.866 | 25.08142 |
| Mass in do             | 2059.813 | 2061.8   | 2184.211 | 2101.941 | 58.17902 |
| Mass Balar             | 105.3373 | 102.1425 | 108.709  | 105.3963 | 2.681048 |

|                        |           |          |          |          |          |
|------------------------|-----------|----------|----------|----------|----------|
| Osmolality             | 900       |          |          |          |          |
| Barrier                | PermeaPad |          |          |          |          |
| Time                   | A         | B        | C        | mean     | SD       |
| 1800                   | 8.780868  | 9.764531 | 6.680145 | 8.408514 | 1.286428 |
| 2700                   | 13.58985  | 13.21894 | 10.90118 | 12.56999 | 1.189706 |
| 3600                   | 16.53166  | 19.10176 | 15.62555 | 17.08632 | 1.472354 |
| 4500                   | 23.96452  | 24.85572 | 21.4109  | 23.41038 | 1.459909 |
| 5400                   | 29.04867  | 29.38061 | 24.62524 | 27.68484 | 2.167703 |
| Flux (µg/cn            | 0.005657  | 0.005652 | 0.005156 | 0.005488 | 0.000235 |
| Papp (10 <sup>-6</sup> | 22.81326  | 22.16339 | 20.28955 | 21.7554  | 1.069927 |
| Mass in do             | 1983.652  | 2040.159 | 2032.788 | 2018.866 | 25.08142 |
| Mass in do             | 2099.122  | 2163.396 | 2142.085 | 2134.868 | 26.73132 |
| Mass Balar             | 107.2855  | 107.4807 | 106.5881 | 107.1181 | 0.383133 |

|                        |               |          |          |          |          |
|------------------------|---------------|----------|----------|----------|----------|
| Osmolality             | 50            |          |          |          |          |
| Barrier                | Support sheet |          |          |          |          |
| Time                   | A             | B        | C        | mean     | SD       |
| 1800                   | 12.20301      | 12.46853 | 10.59354 | 11.75503 | 0.828417 |
| 2700                   | 19.62025      | 19.17709 | 15.58837 | 18.12857 | 1.805281 |
| 3600                   | 26.55433      | 24.96136 | 22.23609 | 24.58393 | 1.783001 |
| 4500                   | 32.21227      | 31.66992 | 27.09449 | 30.32556 | 2.295416 |
| 5400                   | 39.56648      | 35.78417 | 30.56235 | 35.30433 | 3.691548 |
| Flux (µg/cn            | 0.00748       | 0.006569 | 0.005716 | 0.006588 | 0.00072  |
| Papp (10 <sup>-6</sup> | 28.7524       | 25.25231 | 21.97197 | 25.32556 | 2.768581 |
| Mass in do             | 2081.186      | 2081.186 | 2081.186 | 2081.186 | 0        |
| Mass in do             | 2043.374      | 2043.609 | 2220.064 | 2102.349 | 83.23722 |
| Mass Balar             | 100.0843      | 99.91388 | 108.1416 | 102.7132 | 3.839023 |

|                        |               |          |          |          |          |
|------------------------|---------------|----------|----------|----------|----------|
| Osmolality             | 300           |          |          |          |          |
| Barrier                | Support sheet |          |          |          |          |
| Time                   | A             | B        | C        | mean     | SD       |
| 1800                   | 8.73693       | 11.10311 | 9.911397 | 9.917145 | 0.965997 |
| 2700                   | 13.33929      | 16.99241 | 15.25779 | 15.1965  | 1.492011 |
| 3600                   | 19.20729      | 22.25677 | 20.98724 | 20.8171  | 1.250744 |
| 4500                   | 23.4893       | 30.40953 | 27.30438 | 27.06773 | 2.830124 |
| 5400                   | 28.71135      | 35.61086 | 30.81422 | 31.71214 | 2.887391 |
| Flux (µg/cn            | 0.005567      | 0.006937 | 0.005984 | 0.006162 | 0.000574 |
| Papp (10 <sup>-6</sup> | 21.39756      | 26.66541 | 23.00066 | 23.68788 | 2.204805 |
| Mass in do             | 2081.186      | 2081.186 | 2081.186 | 2081.186 | 0        |



|            |          |          |          |          |          |
|------------|----------|----------|----------|----------|----------|
| Mass in do | 2093.79  | 2106.629 | 2026.804 | 2075.741 | 34.99834 |
| Mass Balar | 101.9852 | 102.9336 | 98.86759 | 101.2621 | 1.736903 |

### Celecoxib

|             |           |          |          |          |          |
|-------------|-----------|----------|----------|----------|----------|
| Osmolality  | 50        |          |          |          |          |
| Barrier     | PermeaPad |          |          |          |          |
| Time        | A         | B        | C        | mean     | SD       |
| 7200        | 87.40203  | 82.88613 | 2.573804 | 57.62065 | 38.96764 |
| 14400       | 286.325   | 287.6999 | 45.85713 | 206.6273 | 113.6831 |
| 21600       | 505.7828  | 483.2143 | 92.83603 | 360.6111 | 189.5696 |
|             |           |          |          |          |          |
|             |           |          |          |          |          |
| Flux (µg/cn | 0.029054  | 0.027801 | 0.006268 | 0.021041 | 0.010458 |
| Papp (10-6  | 23.51246  | 22.95531 | 7.384184 | 17.95065 | 7.475082 |
| Mass in do  | N/A       | N/A      | N/A      | N/A      | N/A      |
| Mass in do  | N/A       | N/A      | N/A      | N/A      | N/A      |
| Mass Balar  | N/A       | N/A      | N/A      | N/A      | N/A      |

|             |           |          |          |          |          |
|-------------|-----------|----------|----------|----------|----------|
| Osmolality  | 150       |          |          |          |          |
| Barrier     | PermeaPad |          |          |          |          |
| Time        | A         | B        | C        | mean     | SD       |
| 7200        | 98.93074  | 39.04647 | 13.80545 | 50.59422 | 35.69866 |
| 14400       | 224.8918  | 161.6276 | 62.02829 | 149.5159 | 67.03806 |
| 21600       | 340.985   | 302.6142 | 121.0601 | 254.8864 | 95.91733 |
|             |           |          |          |          |          |
|             |           |          |          |          |          |
| Flux (µg/cn | 0.016809  | 0.018303 | 0.007448 | 0.014187 | 0.004804 |
| Papp (10-6  | 13.60314  | 15.1133  | 8.7743   | 12.49691 | 2.70352  |
| Mass in do  | N/A       | N/A      | N/A      | N/A      | N/A      |
| Mass in do  | N/A       | N/A      | N/A      | N/A      | N/A      |
| Mass Balar  | N/A       | N/A      | N/A      | N/A      | N/A      |

|             |           |          |          |          |          |
|-------------|-----------|----------|----------|----------|----------|
| Osmolality  | 300       |          |          |          |          |
| Barrier     | PermeaPad |          |          |          |          |
| Time        | A         | B        | C        | mean     | SD       |
| 7200        | 65.25777  | 28.78098 | 65.49519 | 53.17798 | 17.25155 |
| 14400       | 205.7154  | 114.2253 | 195.6487 | 171.8631 | 40.96278 |
| 21600       | 382.7224  | 187.206  | 320.3071 | 296.7452 | 81.53949 |
|             |           |          |          |          |          |
|             |           |          |          |          |          |
| Flux (µg/cn | 0.022046  | 0.011002 | 0.017695 | 0.016914 | 0.004543 |
| Papp (10-6  | 17.8411   | 9.084287 | 20.84569 | 15.92369 | 4.98932  |
| Mass in do  | N/A       | N/A      | N/A      | N/A      | N/A      |
| Mass in do  | N/A       | N/A      | N/A      | N/A      | N/A      |
| Mass Balar  | N/A       | N/A      | N/A      | N/A      | N/A      |

|            |           |          |          |          |          |
|------------|-----------|----------|----------|----------|----------|
| Osmolality | 450       |          |          |          |          |
| Barrier    | PermeaPad |          |          |          |          |
| Time       | A         | B        | C        | mean     | SD       |
| 7200       | 8.812744  | 82.52382 | 43.51497 | 44.95051 | 30.10954 |



|             |          |          |          |          |          |
|-------------|----------|----------|----------|----------|----------|
| 14400       | 73.60888 | 231.4329 | 198.9578 | 167.9999 | 68.04853 |
| 21600       | 157.3361 | 375.6803 | 345.5481 | 292.8548 | 96.6126  |
|             |          |          |          |          |          |
|             |          |          |          |          |          |
| Flux (µg/cn | 0.010314 | 0.020358 | 0.020975 | 0.017216 | 0.004887 |
| Papp (10-6  | 8.346819 | 16.80996 | 24.70877 | 16.62185 | 6.681061 |
| Mass in do  | N/A      | N/A      | N/A      | N/A      | N/A      |
| Mass in do  | N/A      | N/A      | N/A      | N/A      | N/A      |
| Mass Balar  | N/A      | N/A      | N/A      | N/A      | N/A      |

|             |           |          |          |          |          |
|-------------|-----------|----------|----------|----------|----------|
| Osmolality  | 900       |          |          |          |          |
| Barrier     | PermeaPad |          |          |          |          |
| Time        | A         | B        | C        | mean     | SD       |
| 7200        | 69.53823  | 93.39315 | 101.9679 | 88.29975 | 13.72048 |
| 14400       | 221.8955  | 171.0477 | 230.7446 | 207.8959 | 26.30486 |
| 21600       | 367.6437  | 269.8734 | 428.1068 | 355.208  | 65.19426 |
|             |           |          |          |          |          |
|             |           |          |          |          |          |
| Flux (µg/cn | 0.020702  | 0.012256 | 0.022649 | 0.018535 | 0.004511 |
| Papp (10-6  | 16.75314  | 10.11959 | 26.68081 | 17.85118 | 6.805526 |
| Mass in do  | N/A       | N/A      | N/A      | N/A      | N/A      |
| Mass in do  | N/A       | N/A      | N/A      | N/A      | N/A      |
| Mass Balar  | N/A       | N/A      | N/A      | N/A      | N/A      |

|             |               |          |          |          |          |
|-------------|---------------|----------|----------|----------|----------|
| Osmolality  | 50            |          |          |          |          |
| Barrier     | Support sheet |          |          |          |          |
| Time        | A             | B        | C        | mean     | SD       |
| 7200        | 254.3392      | 251.5814 | 251.5814 | 252.5007 | 1.300048 |
| 14400       | 544.4055      | 582.9276 | 599.9453 | 575.7595 | 23.23364 |
| 21600       | 906.2693      | 915.4307 | 845.335  | 889.0117 | 31.10971 |
|             |               |          |          |          |          |
|             |               |          |          |          |          |
| Flux (µg/cn | 0.045273      | 0.046101 | 0.041233 | 0.044202 | 0.002127 |
| Papp (10-6  | 47.45724      | 48.32489 | 43.22228 | 46.3348  | 2.229209 |
| Mass in do  | N/A           | N/A      | N/A      | N/A      | N/A      |
| Mass in do  | N/A           | N/A      | N/A      | N/A      | N/A      |
| Mass Balar  | N/A           | N/A      | N/A      | N/A      | N/A      |

|             |               |          |          |          |          |
|-------------|---------------|----------|----------|----------|----------|
| Osmolality  | 300           |          |          |          |          |
| Barrier     | Support sheet |          |          |          |          |
| Time        | A             | B        | C        | mean     | SD       |
| 7200        | 215.5952      | 271.6933 | 262.2763 | 249.8549 | 24.52844 |
| 14400       | 536.6164      | 579.2079 | 600.2615 | 572.0286 | 26.47427 |
| 21600       | 895.7964      | 905.8254 | 850.2991 | 883.9736 | 24.16094 |
|             |               |          |          |          |          |
|             |               |          |          |          |          |
| Flux (µg/cn | 0.047236      | 0.044037 | 0.040835 | 0.044036 | 0.002613 |
| Papp (10-6  | 49.51523      | 46.16163 | 42.8051  | 46.16065 | 2.739397 |
| Mass in do  | N/A           | N/A      | N/A      | N/A      | N/A      |
| Mass in do  | N/A           | N/A      | N/A      | N/A      | N/A      |

|            |     |     |     |     |     |
|------------|-----|-----|-----|-----|-----|
| Mass Balar | N/A | N/A | N/A | N/A | N/A |
|------------|-----|-----|-----|-----|-----|
